# Supplementary material
Source: ML conference proceedings conference paper supplement (https://openaccess.thecvf.com/content/cvpr_2016/html/Charles_Personalizing_Human_Video_2016_CVPR_paper.html)
Supplement: Supplementary file 1 [file Charles_Personalizing_Human_Video_2016_CVPR_supplemental.zip]

Archive with 2 entries (2 files):
- demo_video.mp4
- supp_material.pdf
